# Supplementary material
Source: PubMed Central journal article supplement (PMC5489890)
Supplement: ajtr0009-2901-f7.pdf [file ajtr0009-2901-f7.pdf]

## Overexpression of CD47 in ovarian cancer

**Supplementary Table 1.** Primers and sequences used in this study

| Methods              | Primer Name | F/R | Primer sequences (5'-3')        |
|----------------------|-------------|-----|---------------------------------|
| RT-PCR               | CD47        | F   | TCCGGTGGTATGGATGAGAAA           |
|                      |             | R   | ACCAAGGCCAGTAGCATTCTT           |
|                      | GAPDH       | F   | GTCTCCTCTGACTTCAACAGCG          |
|                      |             | R   | ACCACCCTGTTGCTGTAGCAA           |
| Lentiviral Construct | CD47        | F   | GAGGCGATCGCCATGTGGCCCCTGGTAGCG  |
|                      |             | R   | GCGACGCGTTCAGTTATTCTAGGAGGTTGTA |
| CD47-siRNA           | si-1        |     | CCUGGUGAUUACCCAGAGAdTdT         |
|                      | si-2        |     | GCACAAUACUUGGACUAGdTdT          |
|                      | si-3        |     | GUUACUAAUUGGAGGCACdTdT          |

Overexpression of CD47 in ovarian cancer

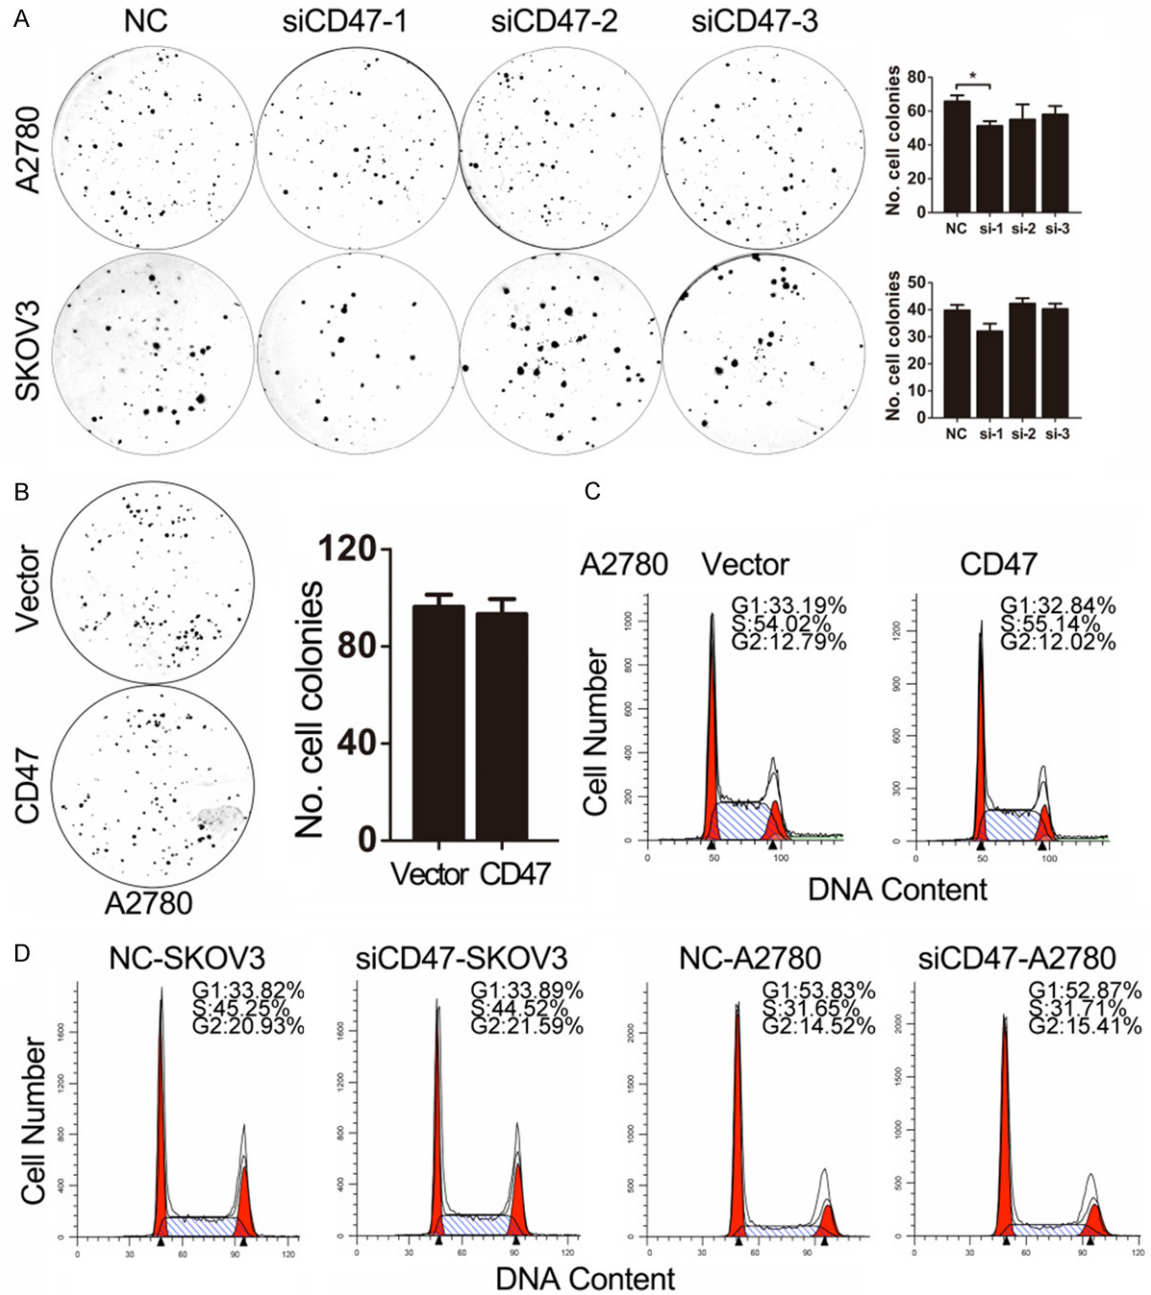

**Supplementary Figure 1.** CD47 had no effect on the proliferation of ovarian cancer cells as measured by (A and B) colony formation assay and (C and D) cell cycle analysis.
